# Supplementary material for: PreDicta chip-based high resolution diagnosis of rhinovirus-induced wheeze
Source: PubMed Central journal article supplement (PMC6006174; doi:10.1038/s41467-018-04591-0), 2018-06-18
Supplement: 41467_2018_4591_MOESM1_ESM.pdf [file 41467_2018_4591_MOESM1_ESM.pdf]

# **PreDicta chip-based high resolution diagnosis of rhinovirus-induced wheeze**

Niespodziana *et al.*

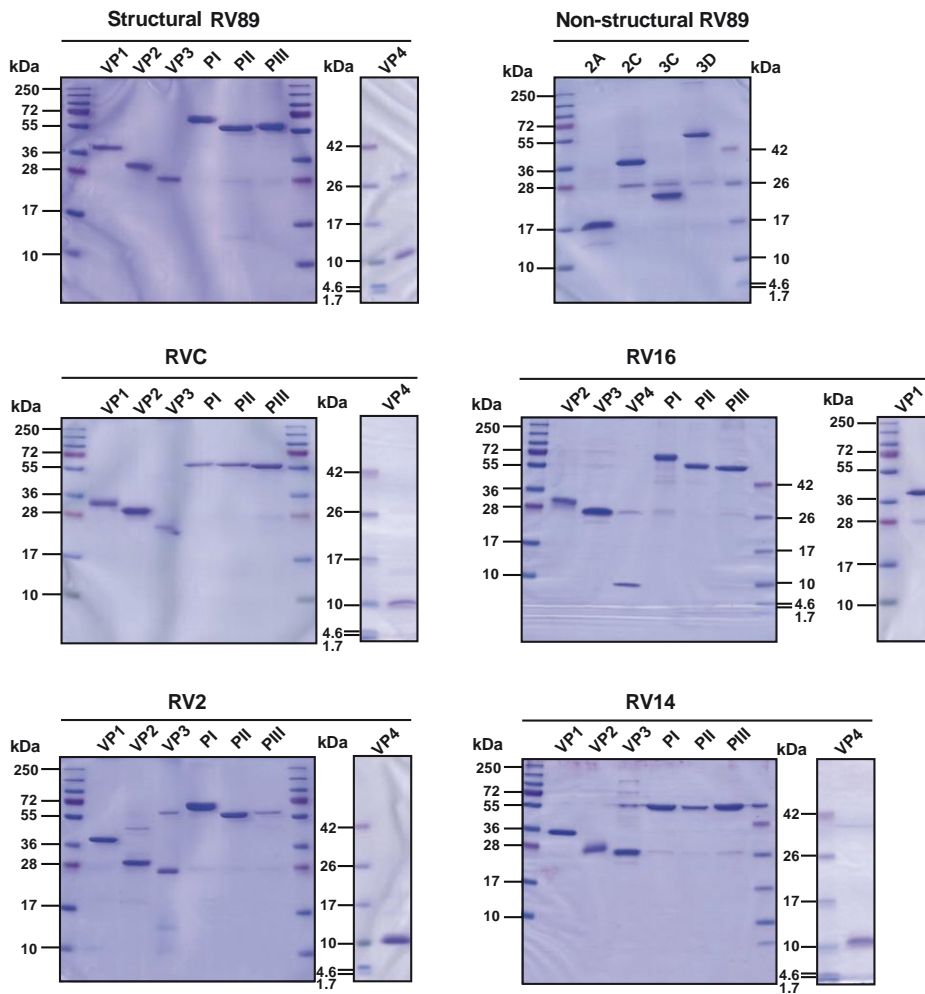

**Supplementary Fig. 1.** Purification of recombinant RV structural and non-structural proteins. Coomassie-stained SDS-PAGE containing recombinant capsid proteins from RV89, RV-C, RV16, RV2, and RV14 (VP1, VP2, VP3, VP4), recombinant VP1 fragments thereof (PI, PII, PIII) and non-structural proteins from RV89 (2A, 2C, 3C, 3D). Molecular masses in kilo Dalton (kDa) are indicated on the left margins.



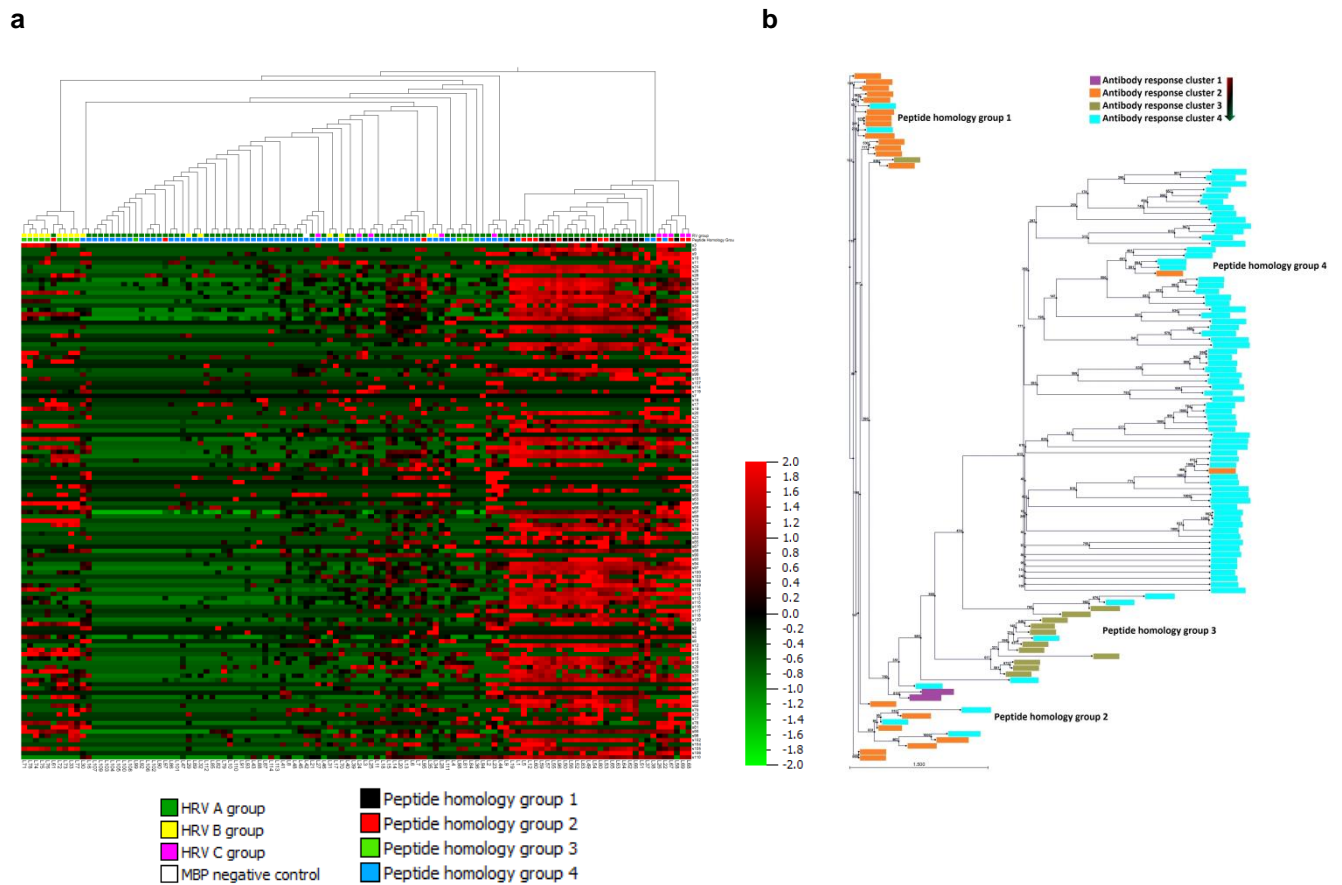

**Supplementary Fig. 3.** Heatmap representation of RV-specific antibody responses measured by RV-chip. **(a)** Shown are IgG levels (ISU-G) to micro-arrayed RV components (bottom line) measured in serum samples obtained from 120 children during the acute wheezing attack according to age (top to bottom: youngest to oldest). IgG levels are shown by colour codes where red represents high and green low values, normalized to have a mean of 0 and a variance of 1. Rows depict specific antibody responses for each subject and columns depict antigen-specific antibody responses throughout all subjects. The color-coded annotations on top of the heat map represent pre-determined groups of peptides that refer either to the RV group or the peptide homology groups as determined in **B**. **(b)** Homology distance cladogram of the micro-arrayed RV components built using the Neighbor Joining algorithm and 1000 bootstrap replicates. The amino acid sequences of the peptides were aligned with a Gap open cost of 10.0 and a Gap extension cost of 1.0. The peptides were then color-coded based on the antibody response cluster that they belong to, with purple representing the cluster with the highest mean measurement and light blue the cluster with the lowest mean measurement and orange and green clusters in between. The antibody response clusters were determined using unsupervised K-means clustering (K=4).

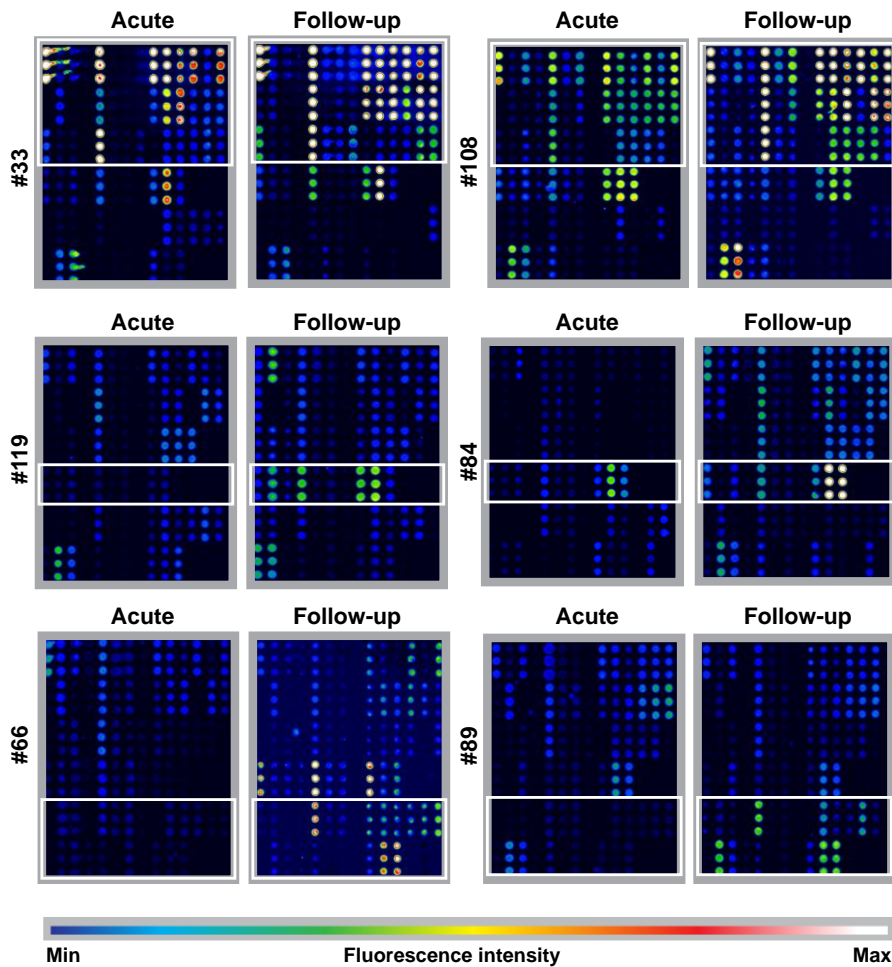

**Supplementary Fig. 4.** Representative alterations of IgG antibody responses to micro-arrayed RV proteins, VP1 protein fragments and VP1 N-terminal peptides after RV infection. Scan images from 6 representative patients (#33, #108, #119, #84, #66, #89) obtained by testing serum samples during and after the wheezing attack. Increasing fluorescence intensities from blue to red/white correspond to the amount of bound antibodies. RV proteins and peptides of RV-A, RV-C and RV-B species are boxed.

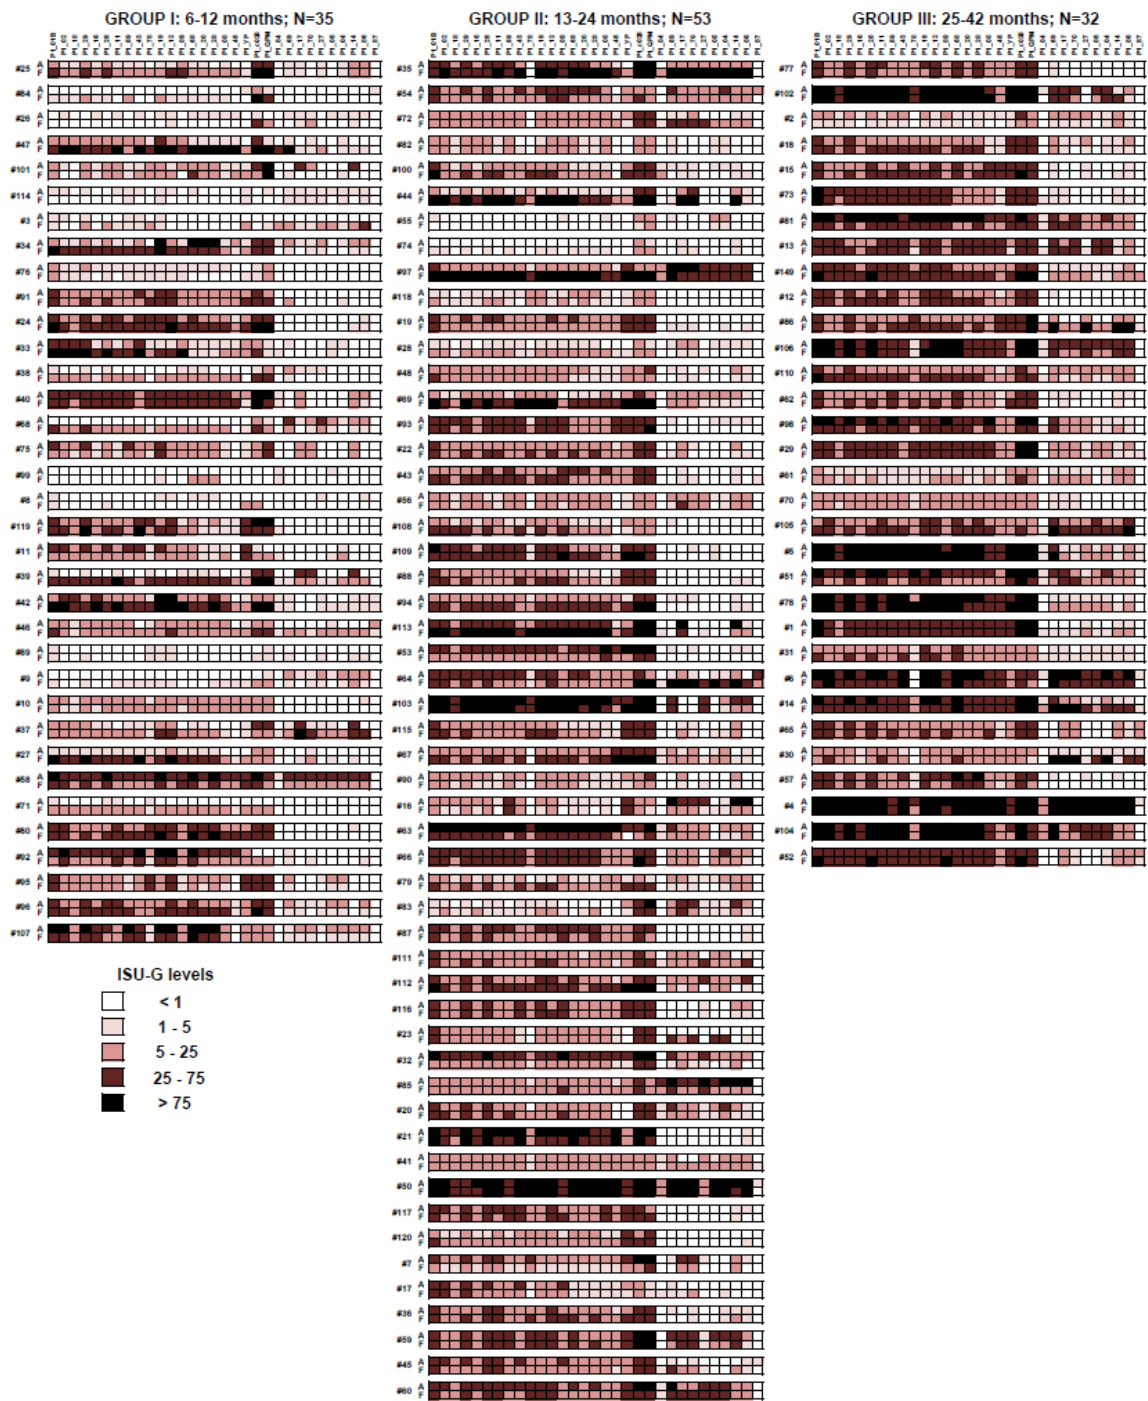

**Supplementary Fig. 5.** IgG levels to the N-terminal VP1 peptides in children according to age (see **Table 1**: groups I-III). Shown are IgG levels (color-coded according to ISU-G levels) to the N-terminal VP1 peptides from RV-A, RV-C and RV-A (top line) at the acute visit (A) and follow-up visit (F) for all children (left margins) in each age group.

**Supplementary Table 1.** Recombinant RV proteins, protein fragments and VP1 synthetic peptides spotted on the PreDicta chip.

| Antigens                                       | RV source strains                                                                | Recombinant protein/synthetic peptide | Total no. of antigens | Rationale                                                                 |
|------------------------------------------------|----------------------------------------------------------------------------------|---------------------------------------|-----------------------|---------------------------------------------------------------------------|
| *Structural proteins, VP1-VP4                  | RV-A: 02, 16, 89<br>RV-C: YP<br>RV-B: 14                                         | Recombinant proteins                  | 20                    | To characterize RV-specific antibody responses to capsid proteins         |
| *MBP fusion proteins, containing VP1 fragments | RV-A: 02, 16, 89<br>RV-C: YP<br>RV-B: 14                                         | Recombinant proteins                  | 15                    | To map epitopes of VP1                                                    |
| *MBP fusion proteins, containing VP2 fragments | RV-A: 89                                                                         | Recombinant proteins                  | 3                     | To map epitopes of VP2                                                    |
| *MBP fusion proteins, containing VP3 fragments | RV-A: 89                                                                         | Recombinant proteins                  | 3                     | To map epitopes of VP3                                                    |
| *Non-structural proteins                       | RV-A: 89                                                                         | Recombinant proteins                  | 6                     | To characterize RV-specific antibody responses to non-structural proteins |
| †VP1 N-terminal peptides                       | RV-A: 18 RV strains<br>RV-C: 3 RV strains<br>RV-B: 9 RV strains<br>HEV: 1 strain | Synthetic peptides                    | 31                    | Detection of species- and strain-specific responses                       |
| ‡VP1 overlapping peptides                      | RV-A: 89                                                                         | Synthetic peptides                    | 20                    | To map epitopes of VP1                                                    |
| *VP1 non-overlapping peptides                  | RV-A: 89                                                                         | Synthetic peptides                    | 16                    | To map epitopes of VP1                                                    |
| §Allergens                                     | n.a.                                                                             | Recombinant or natural proteins       | 16                    | Calibration of IgG and IgA responses                                      |
| §Maltose Binding Protein                       | n.a.                                                                             | Recombinant protein                   | 1                     | Control proteins for the MBP fusion proteins                              |

*Definition of abbreviations:* n.a., not applicable.

\*Supplementary Table 5.

† Supplementary Tables 2 and 3.

‡ Supplementary Table 4.

§ Supplementary Table 6.

**Supplementary Table 2.** Clustering and re-clustering of VP1 peptides according to sequence identities and chemical properties.

| Cluster | Peptides according to sequence identities ( $\leq 5$ aa)                                         | Re-cluster | Peptides according to sequence identities and chemical properties | Peptide selected for CHIP | RV strain |
|---------|--------------------------------------------------------------------------------------------------|------------|-------------------------------------------------------------------|---------------------------|-----------|
| A 1     | 1A, 1B, 2, 9, 10, 15, 18, 21, 24, 29, 31, 32, 33, 34, 38, 39, 40, 47, 49, 50, 74, 81, 85, 90, 98 | A I        | 1A, 1B, 15, 74                                                    | 01p1                      | 1B        |
| A 2     | 23, 2, 16, 21, 25, 29, 30, 40, 41, 49, 54, 61, 62, 73, 81, 82, 85, 96                            | A II       | 2, 9, 21, 23, 24, 30, 32, 33, 34, 49, 50, 57, 76, 90              | 02p1                      | 2         |
| A 3     | 7, 36, 58, 88, 89                                                                                | A III      | 7, 36, 58, 88, 89                                                 | 89p1                      | 89        |
| A 4     | 8, 95                                                                                            | A IV       | 8, 95                                                             | 08p1                      | 8         |
| A 5     | 44, 10, 15, 21, 24, 25, 29, 31, 40, 47, 54, 56, 62, 66, 74, 77, 81, 82, 85, 90, 98, 100          | A V        | 10, 25, 62, 77, 82                                                | 25p1                      | 25        |
| A 6     | 11, 34, 50, 57, 60, 67, 75                                                                       | A VI       | 11, 38, 60, 66, 100                                               | 11p1                      | 11        |
| A 7     | 12, 73                                                                                           | A VII      | 12, 73                                                            | 12p1                      | 12        |
| A 8     | 13, 15, 16, 34, 40, 41, 50, 54, 55, 56, 61, 73, 74, 81, 85, 96, 98                               | A VIII     | 13, 16, 40, 41, 54, 55, 56, 61, 67, 73, 96                        | 16p1                      | 16        |
| A 9     | 19, 22, 56, 64, 82, 94                                                                           | A IX       | 18                                                                | 18p1                      | 18        |
| A 10    | 20, 53, 68                                                                                       | A X        | 19, 22, 64, 82, 94                                                | 19p1                      | 19        |
| A 11    | 28, 51, 53, 68, 103                                                                              | A XI       | 20                                                                | 20p1                      | 20        |
| A 12    | 76, 33, 34, 43, 50, 57, 75                                                                       | A XII      | 28, 46, 51, 53, 65, 71, 80, 103                                   | 28p1                      | 28        |
| A 13    | 43, 75, 76                                                                                       | A XIII     | 29, 31, 44, 47, 81, 85, 98                                        | 29p1                      | 29        |
| A 14    | 45                                                                                               | A XIV      | 43, 75                                                            | 43p1                      | 43        |
| A 15    | 59, 39, 40, 56, 63                                                                               | A XV       | 45                                                                | 45p1                      | 45        |
| A 16    | 46, 51, 53, 65, 68, 71, 80, 103                                                                  | A XVI      | 59, 39, 56, 63                                                    | 59p1                      | 59        |
| A 17    | 78                                                                                               | A XVII     | 68                                                                | 68p1                      | 68        |
|         |                                                                                                  | A XVIII    | 78                                                                | 78p1                      | 78        |
| B 1     | 3, 6, 14, 35, 37, 72, 79, 83, 92                                                                 | B I        | 3, 6, 14, 35, 37, 72, 79, 83, 92                                  | 14p1                      | 14        |
| B 2     | 4                                                                                                | B II       | 4                                                                 | 04p1                      | 4         |
| B 3     | 5, 26, 42, 99                                                                                    | B III      | 5, 26, 42, 99                                                     | 05p1                      | 5         |
| B 4     | 17, 37, 52, 84                                                                                   | B IV       | 17, 48, 52, 84                                                    | 17p1                      | 17        |
| B 5     | 27, 93, 97                                                                                       | B V        | 27, 93, 97                                                        | 27p1                      | 27        |
| B 6     | 48, 52, 70                                                                                       | B VI       | 69                                                                | 69p1                      | 69        |
| B 7     | 69                                                                                               | B VII      | 70, 91                                                            | 70p1                      | 70        |
| B 8     | 70, 91                                                                                           | B VIII     | 84                                                                | 84p1                      | 84        |
| B 9     | 86                                                                                               | B IX       | 86                                                                | 86p1                      | 86        |
| C 1     | YP, c024                                                                                         | C I        | YP, c024                                                          | YPp1                      | YP        |
| C 2     | QCE, c026, QPM                                                                                   | C II       | QCE, c026, QPM                                                    | QPMp1                     | QPM       |
| C 3     | c025                                                                                             | C III      | c025                                                              | C025p1                    | c025      |
| E 1     | 68                                                                                               | E I        | 68                                                                | 68p1*                     | 68        |

\*68p1 belongs to Enterovirus;



**Supplementary Table 3. Synthetic VP1 N-terminal peptides.**

| Peptide | Species | Strain | Amino acid sequence                       | Position* | Length [aa] <sup>†</sup> | Molecular weight [Dalton] | GenBank accession number |
|---------|---------|--------|-------------------------------------------|-----------|--------------------------|---------------------------|--------------------------|
| 01p1    | RV-A    | 1B     | NPVENYIDEVLNEVLVVPNIKESHHTTSSNSAPLLDAAETG | 1-40      | 40                       | 4331                      | AAQ19856                 |
| 02p1    | RV-A    | 2      | NPVENYIDEVLNEVLVVPNINSSNPSTSSNSAPALDAAETG | 1-40      | 40                       | 4169                      | AAQ19857                 |
| 04p1    | RV-B    | 4      | GLGEDLMVEIVDKTHQTLASVKSDSKHTQKVPALTANETG  | 1-40      | 40                       | 4250                      | AAQ19859                 |
| 05p1    | RV-B    | 5      | GLEDDLVEVIVDKAQQTLASIKSDSKHTQKVPSLTANETG  | 1-40      | 40                       | 4267                      | AAQ19860                 |
| 08p1    | RV-A    | 8      | NPVIEQFTEAVLNEVLVVPNTQASNGSIANSAPALDAAETG | 1-40      | 40                       | 4053                      | ACK37369                 |
| 11p1    | RV-A    | 11     | NPVEDYVDGILNEVLVVPNIKESQATTSNSAPALDAAETG  | 1-40      | 40                       | 4143                      | AAQ19866                 |
| 12p1    | RV-A    | 12     | NPVERYVDEVLNEVLVVPNINKSNGQLSNAAPALDAAETG  | 1-40      | 40                       | 4222                      | AAQ19867                 |
| 14p1    | RV-B    | 14     | GLGDELEEVIVEKTKQTVASISSGPKHTQKVPILTANETG  | 1-40      | 40                       | 4206                      | AAQ19869                 |
| 16p1    | RV-A    | 16     | NPVERYVDEVLNEVLVVPNINESHPTSSNAAPVLDAAETG  | 1-40      | 40                       | 4275                      | AAQ19871                 |
| 17p1    | RV-B    | 17     | GFEDLEEVVIDKMKQVTASSQSGPKHTQKVPALSANETG   | 1-40      | 40                       | 4287                      | AAQ19872                 |
| 18p1    | RV-A    | 18     | NPVENYIDEVLNEVLVVPNVNESHAISSNSAPALDAAETG  | 1-40      | 40                       | 4207                      | AAQ19873                 |
| 19p1    | RV-A    | 19     | NPVEKYVDLILNEVLVVPNINESHPTSSNAAPALDAAETG  | 1-40      | 40                       | 4158                      | ACK37375                 |
| 20p1    | RV-A    | 20     | NPVERYTEAILNEVLVVPNITSSNSQTSNAAPALDAAETG  | 1-40      | 40                       | 4158                      | ACK37376                 |
| 25p1    | RV-A    | 25     | NPIENYVDQVLNEVLVVPNIKESHPTSSNSAPILDAAETG  | 1-40      | 40                       | 4276                      | ACK37379                 |
| 27p1    | RV-B    | 27     | GLGEELEEVIVDKAKQTIASVSSNSKHTQKVPVTLASSETG | 1-40      | 40                       | 4170                      | ACK37442                 |
| 28p1    | RV-A    | 28     | NPVEKYTEALLNEVLVVPNINPSNAQTTNAAPALDAAETG  | 1-40      | 40                       | 4151                      | AAQ19883                 |
| 29p1    | RV-A    | 29     | NPVENYVDEVLNEVLVVPNIRESHPTSSNSAPILDAAETG  | 1-40      | 40                       | 4291                      | ACK37381                 |
| 43p1    | RV-A    | 43     | NPVENYVDEILNQVLVVPNTVESHSTSSNAAPALDAAETG  | 1-40      | 40                       | 4181                      | ACK37387                 |
| 45p1    | RV-A    | 45     | NPVEQFAEAVLDQVLVVPNTRPSDGLIANSAPALDAAETG  | 1-40      | 40                       | 4091                      | ACK37388                 |
| 59p1    | RV-A    | 59     | NPVENYVNDVLNEVLVVPNIQESHPTSSNAAPALDAAETG  | 1-40      | 40                       | 4204                      | AAQ19914                 |
| 68p1    | RV-A    | 68     | NPVEKYTEAVLNEVLVVPNIPASNTQTSNAAPALDAAETG  | 1-40      | 40                       | 4110                      | ACK37406                 |
| 69p1    | RV-B    | 69     | GLGEELEEVVIDKMKQVTASVQSGSKHTQKVPALSASETG  | 1-40      | 40                       | 4170                      | ACK37407                 |
| 70p1    | RV-B    | 70     | GFEGELEEVVIDKMKQVTASSQSGPKYTQKVPALSANETG  | 1-40      | 40                       | 4255                      | AAQ19925                 |
| 78p1    | RV-A    | 78     | NPVEEYVDQVLNEVLVVPNIKESKPQSSNSAPVLDAAETG  | 1-40      | 40                       | 4281                      | ACK37439                 |
| 84p1    | RV-B    | 84     | GLEDVLEEVIVDKAKQTIASINSNSKYTQQVPTLSASETG  | 1-40      | 40                       | 4265                      | AAQ19939                 |
| 86p1    | RV-B    | 86     | GLGDELEEVIVEKTKQTLASVATGSKYTQKVPVLSANETG  | 1-40      | 40                       | 4180                      | ACK37420                 |
| 89p1    | RV-A    | 89     | NPVENYIDSVLNEVLVVPNIQPSTSVSSHAA‡          | 1-31      | 31                       | 3293                      | AAQ19944                 |
| YPp1    | RV-C    | C_YP   | NPVEDYIDKVVDTVLQVPNTQPSGQHSIQPSALGAMEIG   | 1-40      | 40                       | 4246                      | YP_001552435             |
| QPMp1   | RV-C    | C_QPM  | NPVEEFVEHTLKEVLVVPDTPQASGPVHTTKPQALGAVEIG | 1-40      | 40                       | 4238                      | ABP38410                 |
| c025p1  | RV-C    | C_025  | NPVEQFVDNVLEEVLPNTQPSGPIHTTKPTALSAMEIG    | 1-40      | 40                       | 4273                      | ABU62849                 |
| 68p1    | HEV     | 68     | LDHLHGAAEAYQVESIIKTATDVTVKSEIDAEIGVPSLNA  | 1-40      | 40                       | 4207                      | AAQ19942                 |

\*Position denotes the corresponding region of the VP1 protein.

<sup>†</sup>Length: number of amino acids, aa.

‡Due to difficulties with peptide synthesis, P1A (Table E4) has been used for analysis.

**Supplementary Table 4.** 89VP1-derived peptides spotted on the PreDicta chip.

| Peptide* | Amino acid sequence                                            | Position‡ | Length [aa]§ | Molecular weight [Dalton] | Motifs         |
|----------|----------------------------------------------------------------|-----------|--------------|---------------------------|----------------|
| p1A      | MNPVENYIDSVLNEVLVVPNIQPSTSVSSHAA                               | 2-32      | 32           | 3424                      |                |
| p1B      | PALDAAETGHTSSVQPEDMIETRYVITDQTRDET                             | 33-66     | 34           | 3778                      |                |
| p1C      | SIESFLGRSGCIAMIEFNTSSDKTEHDKIGKGFK                             | 67-100    | 34           | 3734                      |                |
| p1aS     | NPVENYIDSVLNEVLVV                                              | 1-17      | 17           | 1916                      |                |
| p1bS     | NPVENYIDSVLNEVLVVPNIQ†                                         | 1-21      | 21           | 2368                      |                |
| p2S      | VVPNIQPSTSVSSHAA <u>PALD</u> †                                 | 16-35     | 20           | 1990                      |                |
| p3S      | APALDAAETGHTSSVQ <u>PEDM</u> †                                 | 31-50     | 20           | 2027                      |                |
| p4S      | QPEDMIETRYVITDQ <u>TRDET</u> †                                 | 46-65     | 20           | 2440                      |                |
| p5S      | TRDETSIESFLGRSGC <u>IAMI</u> †                                 | 61-80     | 20           | 2186                      |                |
| p6S      | CIAMIEFNTSSDKTEHDKIG†                                          | 76-95     | 20           | 2239                      | NIm-IA, NIm-IB |
| p7S      | HDKIGKGFKTKWISLQ <u>EMAQ</u> †                                 | 91-110    | 20           | 2345                      |                |
| p8S      | QEMAQIRRKYE <u>LFTYTRFDS</u> †                                 | 106-125   | 20           | 2582                      |                |
| p9S      | TRFDSEITIVTAAAAQ <u>GDDS</u> †                                 | 121-140   | 20           | 2068                      | NIm-IB         |
| p10S     | QGDDSGHIVLQFM <u>YVPPGA</u> †                                  | 136-154   | 19           | 2031                      |                |
| p11S     | VPPGAPVPEKRDDY <u>TWQSGTN</u> †                                | 150-170   | 21           | 2312                      | ICAM-1         |
| p12S     | QSGTNASVFWQEGQ <u>PYPRFT</u> †                                 | 166-185   | 20           | 2300                      |                |
| p13S     | YPRFTIPFMSIASAY <u>MFYD</u> †                                  | 181-200   | 20           | 2483                      |                |
| p14S     | YMFYDGYDGDSAASK <u>YGSVV</u> †                                 | 196-215   | 20           | 2195                      |                |
| p15S     | YGSVVNDMGTCVRI <u>VTSN</u> †                                   | 211-230   | 20           | 2129                      | ICAM-1         |
| p16S     | IVTSNQKHDNLIVC <u>RIYHKA</u> †                                 | 226-245   | 20           | 2352                      |                |
| p17S     | IYHKAKHIKAWCPRP <u>PRAVA</u> †                                 | 241-260   | 20           | 2342                      |                |
| p18S     | PRAVAYQHTSTNYI <u>PSNGE</u> †                                  | 256-275   | 20           | 2242                      |                |
| p19S     | PSNGEATTQIKTRPDVFTV <u>TNV</u>                                 | 271-292   | 22           | 2375                      | NIm-IV         |
| p1L      | NPVENYIDSVLNEVLVVPNIQPSTSVSSHAA <u>PAC</u> **                  | 1-33      | 34           | 3564                      |                |
| p2L      | LDAAETGHTSSVQPEDMIETRYVITDQTRDETS <u>SC</u> **                 | 34-66     | 34           | 3800                      |                |
| p3L      | IESFLGRSGCIAMIEFNTSSDKTEHDKIGKGFK <u>TC</u> **                 | 67-102    | 35           | 3851                      |                |
| p3aL     | IESFLGRSGCIAMIEFNTSSDKTEHDKIGKGFKTKWISLQ <u>EMC</u> **         | 67-110    | 43           | 4867                      | NIm-IA, NIm-IB |
| p4L      | WKISLQEMAQIRRKYE <u>LFTYTRFDSEITIVTAAC</u> **                  | 101-133   | 34           | 4112                      |                |
| p4aL     | AQIRRKYE <u>LFTYTRFDSEITIVTAAAAQGDDSGHIVLQFM</u> <u>YVC</u> ** | 109-150   | 43           | 4929                      | NIm-IB         |
| p5L      | AAQGDDSGHIVLQFM <u>YVPPGAPVPEKRDDYTWQC</u> **                  | 134-166   | 34           | 3792                      | ICAM-1         |
| p5aL     | AAQGDDSGHIVLQFM <u>YVPPGAPVPEKRDDYTWQSGTNASVFC</u> **          | 133-174   | 43           | 4627                      | ICAM-1         |
| p6L      | SGTNASVFWQEGQ <u>PYPRFTIPFMSIASAYMFYDC</u> **                  | 167-200   | 35           | 4076                      |                |
| p7L      | GYDGDSAASKYGSVVNDMGTCVRI <u>VTSNQKHC</u> **                    | 201-233   | 34           | 3577                      | ICAM-1         |
| p7aL     | ASAYMFYDGYDGDSAASKYGSVVNDMGTCVRI <u>VTSNQKHC</u> **            | 192-233   | 43           | 4690                      | ICAM-1         |
| p8L      | DLNIVC <u>RIYHKAKHIKAWCPRPRAVAYQHTS</u> <u>SC</u> **           | 234-266   | 34           | 4013                      |                |
| p9L      | TNYI <u>PSNGEATTQIKTRPDVFTGTNV</u> <u>C</u> **                 | 267-292   | 27           | 2928                      | NIm-IV         |

\*Definition of abbreviations: S, short; L, long, aa, amino acid.

†Underlined are 5 aa overlapping sequences between peptides.

‡Position denotes the corresponding region of the 89VP1 protein (GenBank accession number: AAQ19944.1).

§Length: number of amino acids, aa.

||NIm IA, IB, IV, denote binding sites for neutralizing antibodies and ICAM-1, respectively.

\*\*Cysteine residues added for coupling are underlined.

**Supplementary Table 5.** Structural and non-structural RV proteins and fragments spotted on the PreDicta chip.

| Species                        | Strain  | Protein            | Expression vector | Length [aa] <sup>*</sup> | Calculated molecular weight [kDa] <sup>†</sup> | Calculated isoelectric point <sup>†</sup> | GenBank accession number of source strains |
|--------------------------------|---------|--------------------|-------------------|--------------------------|------------------------------------------------|-------------------------------------------|--------------------------------------------|
| <i>Structural proteins</i>     |         |                    |                   |                          |                                                |                                           |                                            |
| RV-A                           | 89      | 89VP1              | pET27b            | 1-292                    | 33.6                                           | 6.08                                      | AAQ19944.1 <sup>‡</sup>                    |
|                                |         | 89VP2              | pET27b            | 1-267                    | 30.6                                           | 6.37                                      | AAA45762.1                                 |
|                                |         | 89VP3              | pET27b            | 1-238                    | 27.5                                           | 6.23                                      | AAA45762.1                                 |
|                                |         | 89VP4              | pET27b            | 1-68                     | 8.3                                            | 7.06                                      | AAA45762.1                                 |
|                                |         | 89VP1-PI           | pMALC4X           | 1-100                    | 54.9                                           | 5.15                                      | AAQ19944.1 <sup>3</sup>                    |
|                                |         | 89VP1-PII          | pMALC4X           | 101-200                  | 55.7                                           | 5.36                                      | AAQ19944.1 <sup>3</sup>                    |
|                                |         | 89VP1-PIII         | pMALC4X           | 201-292                  | 54.2                                           | 6.22                                      | AAQ19944.1 <sup>3</sup>                    |
|                                |         | 89VP2-PI           | pMALC4X           | 1-90                     | 54.0                                           | 5.28                                      | AAA45762.1                                 |
|                                |         | 89VP2-PII          | pMALC4X           | 91-180                   | 54.0                                           | 5.69                                      | AAA45762.1                                 |
|                                |         | 89VP2-PIII         | pMALC4X           | 181-267                  | 53.4                                           | 5.79                                      | AAA45762.1                                 |
|                                |         | 89VP3-PI           | pMALC4X           | 1-80                     | 53.0                                           | 5.34                                      | AAA45762.1                                 |
|                                |         | 89VP3-PII          | pMALC4X           | 81-160                   | 52.8                                           | 5.71                                      | AAA45762.1                                 |
| 89VP3-PIII                     | pMALC4X | 161-238            | 52.7              | 5.54                     | AAA45762.1                                     |                                           |                                            |
| RV-A                           | 16      | 16VP1              | pET27b            | 1-285                    | 33.4                                           | 6.65                                      | AAQ19871.1                                 |
|                                |         | 16VP2              | pET27b            | 1-261                    | 29.9                                           | 6.52                                      | Q82122.4                                   |
|                                |         | 16VP3              | pET27b            | 1-238                    | 26.3                                           | 6.21                                      | Q82122.4                                   |
|                                |         | 16VP4              | pET27b            | 1-68                     | 8.31                                           | 7.06                                      | Q82122.4                                   |
|                                |         | 16VP1-PI           | pMALC4X           | 1-100                    | 55.3                                           | 5.06                                      | AAQ19871.1                                 |
|                                |         | 16VP1-PII          | pMALC4X           | 101-200                  | 55.6                                           | 5.53                                      | AAQ19871.1                                 |
|                                |         | 16VP1-PIII         | pMALC4X           | 201-285                  | 53.8                                           | 6.98                                      | AAQ19871.1                                 |
| RV-A                           | 02      | 02VP1              | pET27b            | 1-283                    | 33.1                                           | 6.34                                      | AAQ19857.1                                 |
|                                |         | 02VP2              | pET27b            | 1-261                    | 29.9                                           | 6.72                                      | CAA26181.1                                 |
|                                |         | 02VP3              | pET27b            | 1-237                    | 27.0                                           | 6.81                                      | CAA26181.1                                 |
|                                |         | 02VP4              | pET27b            | 1-68                     | 8.3                                            | 7.06                                      | CAA26181.1                                 |
|                                |         | 02VP1-PI           | pMALC4X           | 1-100                    | 55.1                                           | 5.06                                      | AAQ19857.1                                 |
|                                |         | 02VP1-PII          | pMALC4X           | 101-200                  | 55.6                                           | 5.34                                      | AAQ19857.1                                 |
|                                |         | 02VP1-PIII         | pMALC4X           | 201-283                  | 53.7                                           | 6.77                                      | AAQ19857.1                                 |
| RV-C                           | YP      | YPVP1              | pET27b            | 1-274                    | 31.8                                           | 6.92                                      | YP001552435.1                              |
|                                |         | YPVP2              | pET27b            | 1-261                    | 29.7                                           | 6.58                                      | YP001552433.1                              |
|                                |         | YPVP3              | pET27b            | 1-235                    | 26.8                                           | 6.10                                      | YP001552434.1                              |
|                                |         | YPVP4              | pET27b            | 1-66                     | 8.0                                            | 7.06                                      | YP001552432.1                              |
|                                |         | YPVP1-PI           | pMALC4X           | 1-100                    | 55.0                                           | 5.29                                      | YP001552435.1                              |
|                                |         | YPVP1-PII          | pMALC4X           | 101-200                  | 55.6                                           | 5.36                                      | YP001552435.1                              |
|                                |         | YPVP1-PIII         | pMALC4X           | 201-274                  | 52.7                                           | 6.36                                      | YP001552435.1                              |
| RV-B                           | 14      | 14VP1              | pET27b            | 1-289                    | 33.5                                           | 6.76                                      | AAQ19869.1                                 |
|                                |         | 14VP2              | pET27b            | 1-262                    | 29.4                                           | 6.52                                      | NP_041009.1                                |
|                                |         | 14VP3              | pET27b            | 1-236                    | 27.1                                           | 6.23                                      | NP_041009.1                                |
|                                |         | 14VP4              | pET27b            | 1-68                     | 8.1                                            | 7.06                                      | NP_041009.1                                |
|                                |         | 14VP1-PI           | pMALC4X           | 1-100                    | 54.9                                           | 5.35                                      | AAQ19869.1                                 |
|                                |         | 14VP1-PII          | pMALC4X           | 101-200                  | 55.3                                           | 5.43                                      | AAQ19869.1                                 |
|                                |         | 14VP1-PIII         | pMALC4X           | 201-274                  | 54.7                                           | 6.26                                      | AAQ19869.1                                 |
| <i>Non-structural proteins</i> |         |                    |                   |                          |                                                |                                           |                                            |
| RV-A                           | 89      | 2A<br>(Protease)   | pET27b            | 1-136                    | 16.5                                           | 5.69                                      | AAA45762.1                                 |
|                                |         | 2C<br>(NTPase)     | pET27b            | 1-321                    | 37.1                                           | 8.87                                      | AAA45762.1                                 |
|                                |         | 3A<br>(unknown)    | pET27b            | 1-76                     | 9.3                                            | 6.25                                      | AAA45762.1                                 |
|                                |         | 3C<br>(Protease)   | pET27b            | 1-183                    | 21.0                                           | 6.62                                      | AAA45762.1                                 |
|                                |         | 3D<br>(Polymerase) | pET27b            | 1-460                    | 52.8                                           | 6.60                                      | AAA45762.1                                 |
|                                |         | 3B<br>(VPg)        | synthetic peptide | 1-21                     | 23.4                                           | 10.27                                     | AAA45762.1                                 |

Definition of abbreviations: kDa, kilo Dalton, aa, amino acid.

<sup>\*</sup>Number of the first and the last aa of the corresponding protein.

<sup>†</sup>Based on the aa sequences, including 1xM (Methionine), 6xH (Histidine) and 1xEF (restriction sites for *EcoRI*: proteins only), calculated with ProtParam, ExPASy. <sup>‡</sup>GenBank accession number for 89VP1 is given for the most similar isolate.

**Supplementary Table 6.** List of allergens and control proteins spotted on the PreDicta chip.

| No. | Source                                    | Name      | Rec. [R] or natural [N] | IgA/IgG calibration |
|-----|-------------------------------------------|-----------|-------------------------|---------------------|
| 1   | <i>Peanut</i>                             | Ara h 1   | R                       | IgG                 |
| 2   | <i>Birch</i>                              | Bet v 1   | R                       | IgG                 |
| 3   | <i>Control-protein</i>                    | BSA       | R                       | IgG                 |
| 4   | <i>Dog</i>                                | Can f 1   | R                       | IgG                 |
| 5   |                                           | Can f 3   | N                       | IgG                 |
| 6   | <i>Bermuda grass</i>                      | Cyn d 1   | N                       | IgG                 |
| 7   | <i>Wheat <math>\gamma</math>-gliadins</i> | Clone 79  | R                       | IgA/IgG             |
| 8   |                                           | Clone 85  | R                       | IgA/IgG             |
| 9   |                                           | Clone 110 | R                       | IgA                 |
| 10  |                                           | GG1       | R                       | IgA                 |
| 11  |                                           | m43       | R                       | IgG                 |
| 12  | <i>House dust mite</i>                    | Der p 1   | N                       | IgG                 |
| 13  |                                           | Der p 10  | R                       | IgG                 |
| 14  | <i>Egg</i>                                | Gal d 1   | N                       | IgG                 |
| 15  | <i>Olive</i>                              | Ole e 9   | R                       | IgA                 |
| 16  | <i>Human</i>                              | HSA       | N                       | IgA/IgG             |
| 17  | <i>E. coli</i>                            | MBP       | R                       | n.a                 |

Definition of abbreviations: n.a, not applicable.

**Supplementary Table 7.** Intra- and inter-assay variations among RV microarrays measured on the same day and on 5 consecutive days, respectively.

| Serum sample  | ISU-G*      | Antigen, <i>n</i> | INTRA-ASSAY, 6 replicates |             |             |             | INTER-ASSAY, 5 replicates |              |             |              |             |
|---------------|-------------|-------------------|---------------------------|-------------|-------------|-------------|---------------------------|--------------|-------------|--------------|-------------|
|               |             |                   | %CV                       |             | SNR         |             | %CV                       |              | SNR         |              |             |
|               |             |                   | Mean                      | SD          | Mean        | SD          | Mean                      | SD           | Mean        | SD           |             |
| <b>NS1</b>    | > 50        | 19                | 10.04                     | 2.07        | 10.39       | 2.28        | 20                        | 14.01        | 1.02        | 7.49         | 1.85        |
| <b>1:200</b>  | 25 - 50     | 12                | 12.55                     | 3.49        | 8.50        | 2.16        | 12                        | 14.42        | 4.24        | 7.59         | 2.61        |
|               | 5 - 25      | 19                | 12.21                     | 4.99        | 9.27        | 3.11        | 19                        | 13.98        | 5.70        | 9.37         | 8.17        |
|               | 1 - 5       | 29                | 26.67                     | 19.75       | 5.86        | 3.63        | 32                        | 28.83        | 20.82       | 5.21         | 2.90        |
|               | <b>Mean</b> |                   | <b>15.37</b>              | <b>7.57</b> | <b>8.51</b> | <b>2.80</b> |                           | <b>17.81</b> | <b>7.95</b> | <b>7.42</b>  | <b>3.88</b> |
| <b>NS2</b>    | > 50        | 8                 | 9.38                      | 2.59        | 4.47        | 0.90        | 9                         | 10.62        | 2.18        | 9.70         | 1.61        |
| <b>1:200</b>  | 25 - 50     | 12                | 10.06                     | 1.70        | 2.36        | 0.50        | 11                        | 13.04        | 3.10        | 8.06         | 1.89        |
|               | 5 - 25      | 34                | 14.46                     | 9.91        | 0.84        | 0.34        | 38                        | 17.58        | 10.45       | 7.14         | 3.18        |
|               | 1 - 5       | 32                | 18.72                     | 13.70       | 0.18        | 0.07        | 30                        | 21.56        | 15.65       | 6.47         | 3.28        |
|               | <b>Mean</b> |                   | <b>13.16</b>              | <b>6.98</b> | <b>1.96</b> | <b>0.45</b> |                           | <b>15.70</b> | <b>7.84</b> | <b>7.84</b>  | <b>2.49</b> |
| <b>NS3</b>    | > 50        | 3                 | 10.74                     | 0.79        | 9.34        | 0.68        | 5                         | 13.03        | 4.81        | 8.72         | 3.76        |
| <b>1:500</b>  | 25 - 50     | 19                | 9.46                      | 2.86        | 11.57       | 3.61        | 17                        | 17.27        | 5.64        | 6.41         | 2.14        |
|               | 5 - 25      | 23                | 11.15                     | 4.16        | 10.52       | 4.54        | 23                        | 17.16        | 5.84        | 6.33         | 2.00        |
|               | 1 - 5       | 31                | 21.39                     | 12.87       | 6.85        | 4.25        | 34                        | 25.02        | 13.78       | 4.99         | 2.09        |
|               | <b>Mean</b> |                   | <b>13.19</b>              | <b>5.17</b> | <b>9.57</b> | <b>3.27</b> |                           | <b>18.12</b> | <b>7.52</b> | <b>6.61</b>  | <b>2.50</b> |
| <b>NS4</b>    | > 50        | 5                 | 9.88                      | 1.59        | 10.39       | 2.06        | 3                         | 7.68         | 1.09        | 13.22        | 2.02        |
| <b>1:2000</b> | 25 - 50     | 16                | 11.17                     | 3.41        | 10.01       | 3.98        | 17                        | 8.89         | 4.15        | 14.00        | 6.86        |
|               | 5 - 25      | 25                | 13.81                     | 5.37        | 8.75        | 5.12        | 25                        | 13.98        | 6.49        | 8.61         | 4.11        |
|               | 1 - 5       | 17                | 31.66                     | 27.76       | 5.83        | 4.26        | 18                        | 25.90        | 15.14       | 4.79         | 1.86        |
|               | <b>Mean</b> |                   | <b>16.63</b>              | <b>9.53</b> | <b>8.74</b> | <b>3.85</b> |                           | <b>14.11</b> | <b>6.72</b> | <b>10.16</b> | <b>3.71</b> |

*Definition of abbreviations:* NS, normal serum; CV, coefficient of variation, SNR, signal to noise ratio; SD, standard deviation.

\*cut-off: 1 ISU-G.
